# Supplementary material for: Endocytic Sorting and Recycling Require Membrane Phosphatidylserine Asymmetry Maintained by TAT-1/CHAT-1
Source: PLOS journal article supplement (doi:10.1371/journal.pgen.1001235), 2010-12-09
Supplement: S1 (10.1371/journal.pgen.1001235.s001) [file journal.pgen.1001235.s001]

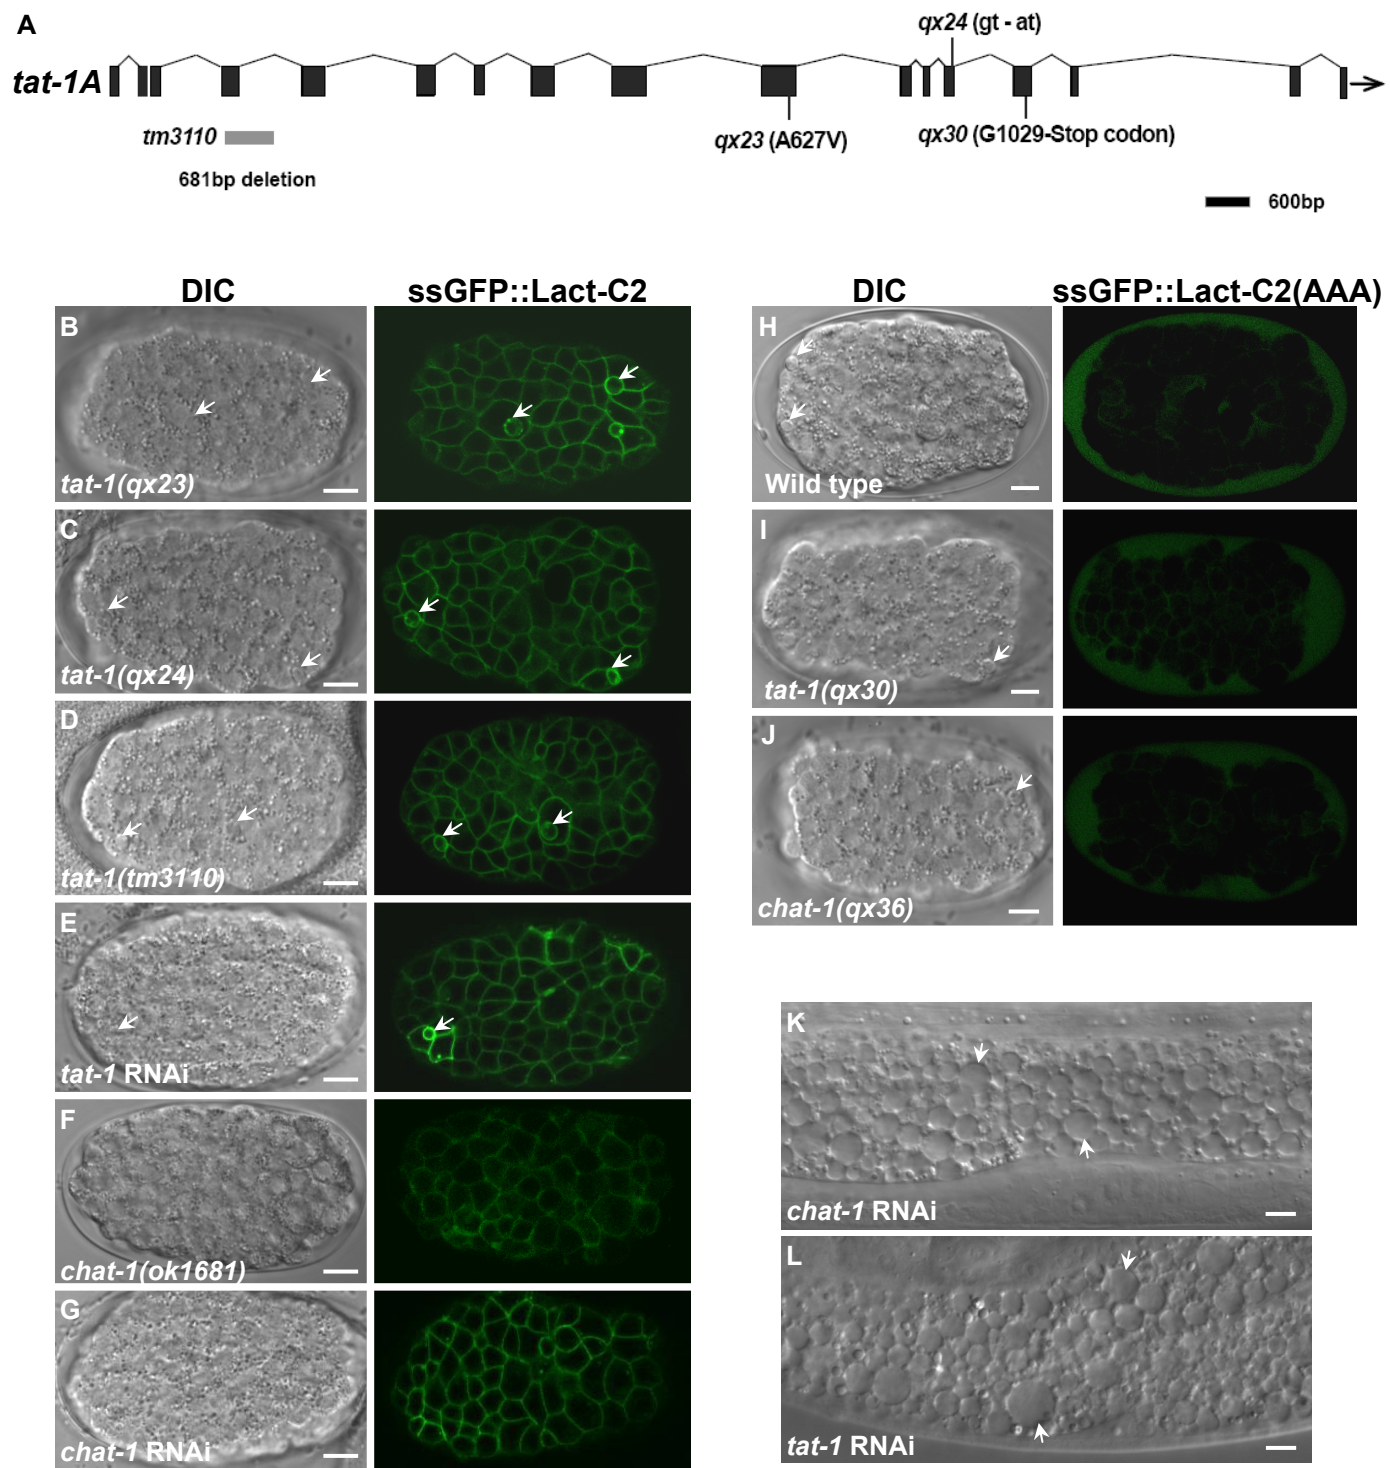

Figure S1
